# Supplementary material
Source: publisher figshare collection journal article supplement (https://geolsoc.figshare.com/ndownloader/files/18541661)
Supplement: Supplementary file 1 [file 18541661]

## Sheet: Sheet1
Analysis	Spot location	207Pb/235U	Uncertainty ± 2σ	206Pb/238U	Uncertainty ± 2σ	rho	Concordance(%)		207Pb/206Pb	Uncertainty ± 2σ	206Pb/238U	Uncertainty ± 2σ	Th/U ratio
Jebel Akhdar
O14-04
04-01	R	1.09378	0.02076	0.12344	0.002	0.642531	99.8403		751.5	31.56	750.3	11.48	0.268873
04-02	OZ R	1.08276	0.01982	0.12091	0.00205	0.739928	95.1753		773.1	26.82	735.8	11.77	0.160082
04-03	OZ R	1.13082	0.02402	0.12282	0.00203	0.556594	89.8136		831.5	37.6	746.8	11.65	0.23759
04-04	OZ R	1.0737	0.0241	0.11792	0.00223	0.669946	88.9356		808	35.36	718.6	12.84	0.201042
04-05	OZ R	0.99468	0.01893	0.1081	0.00178	0.659628	79.7037		830.2	30.66	661.7	10.34	0.194672
04-06	OZ R	1.04939	0.02128	0.11621	0.00198	0.643536	89.5841		791.1	33.41	708.7	11.41	0.210237
04-07	OZ R	1.08781	0.02244	0.12061	0.00203	0.606437	93.1008		788.5	35.06	734.1	11.67	0.246956
04-08	H R	1.00741	0.02082	0.10836	0.00182	0.602863	77.8678		851.7	34.97	663.2	10.56	0.212126
04-09	R	1.15837	0.02916	0.12419	0.00215	0.452967	87.9795		857.7	47.34	754.6	12.32	0.280966
04-10	H R	1.19007	0.02445	0.13217	0.00228	0.65077	102.001		784.5	33.55	800.2	13	0.219652
04-11	OZ R	0.97248	0.01954	0.10658	0.00189	0.706445	80.3668		812.4	30.35	652.9	11.01	0.265348
04-12	OZ R	1.1662	0.02515	0.13024	0.00238	0.669413	102.135		772.8	34.16	789.3	13.58	0.345608
04-13	H R	1.13321	0.02243	0.12672	0.00222	0.70469	99.8961		770	30.15	769.2	12.7	0.444494
04-14	R	0.97902	0.01982	0.10818	0.0019	0.683837	83.2746		795.2	31.53	662.2	11.06	0.122556
04-15	R	0.78033	0.01827	0.08179	0.00141	0.525597	56.0124		904.8	41.6	506.8	8.43	0.309591
04-16	H R	1.1699	0.02656	0.11126	0.00214	0.675982	61.7004		1102.1	33.99	680	12.4	0.259076
04-17	OZ R	0.97091	0.02373	0.09993	0.00181	0.526801	65.1597		942.3	43.18	614	10.61	0.212615
04-18	OZ R	0.74163	0.01534	0.07655	0.00141	0.719267	50.785		936.3	30.03	475.5	8.46	0.258515
04-19	OZ R	0.50456	0.01045	0.05204	0.00096	0.715011	34.8651		937.9	30.23	327	5.88	0.300032
04-20	OZ R	1.09493	0.02143	0.12167	0.00215	0.718085	94.4849		783.3	29.23	740.1	12.34	0.290478
04-21	OZ R	0.89973	0.01784	0.098	0.00165	0.648079	73.0723		824.8	32.38	602.7	9.69	0.489236
04-22	OZ R	1.08455	0.02183	0.12345	0.00224	0.732271	102.472		732.3	29.8	750.4	12.88	0.242236
04-23	OZ R	1.07218	0.02153	0.11776	0.00217	0.747127	88.8683		807.6	28.59	717.7	12.5	0.283775
04-24	H R	1.0945	0.02228	0.11924	0.00218	0.72053	88.0776		824.5	30.02	726.2	12.53	0.310793
04-25	OZ R	0.50668	0.01026	0.05035	0.00093	0.738022	31.2451		1013.6	28.31	316.7	5.69	0.245151
04-26	OZR	1.01772	0.02101	0.10773	0.00195	0.694447	74.5901		884.3	31.3	659.6	11.34	0.300956
04-27	OZ C	1.01774	0.02486	0.11424	0.00224	0.62734	91.4972		762.1	40.62	697.3	12.98	0.286068
04-28	OZ R	1.1111	0.02584	0.12164	0.00234	0.645354	90.8533		814.5	37.66	740	13.43	0.146063
04-29	H C	0.96323	0.02229	0.10182	0.00174	0.519861	70.4815		886.9	41.73	625.1	10.18	0.106699
04-30	OZ R	1.3001	0.03933	0.14131	0.00262	0.36835	102.836		828.6	59.65	852.1	14.79	0.122691
04-31	OZ R	1.06693	0.02347	0.11684	0.00223	0.693419	87.5507		813.7	33.6	712.4	12.85	0.158995
O14-08
08-01	OZ R	0.31091	0.01499	0.02851	0.00063	0.131631	15.4278		1174.5	96.45	181.2	3.97	0.603175
08-02	H C	1.04837	0.02138	0.11507	0.00186	0.567882	86.7754		809.1	35.93	702.1	10.77	0.538677
08-03	H R	0.93697	0.04562	0.08442	0.00193	0.14009	43.2104		1209.2	96.84	522.5	11.45	1.01987
08-04	OZ R	1.16217	0.02298	0.12888	0.00207	0.592356	99.2507		787.4	34.39	781.5	11.79	0.714424
08-05	H C	0.68367	0.01285	0.07395	0.00116	0.608515	54.7826		839.5	31.97	459.9	6.95	1.32916
08-06	OZ R	1.12129	0.02178	0.12285	0.00198	0.615672	91.9158		812.7	32.96	747	11.36	0.20345
08-07	OZ R	0.83369	0.02027	0.09186	0.00161	0.507768	70.786		800.3	44.42	566.5	9.53	0.781
08-08	R	1.10507	0.02661	0.1222	0.00203	0.450568	93.6374		793.7	45.87	743.2	11.69	0.300586
08-09	H R	1.10527	0.02512	0.11976	0.00198	0.50197	87.1936		836.3	41.82	729.2	11.42	0.389051
08-10	OZ R	0.58533	0.01219	0.06339	0.00105	0.584063	47.3301		837.1	35.89	396.2	6.36	0.439527
08-11	OZ C	0.96689	0.02135	0.10618	0.00171	0.497301	80.4875		808.2	41.08	650.5	9.95	0.649774
08-12	R	1.08909	0.02478	0.12073	0.00203	0.5222	93.2124		788.2	41.46	734.7	11.67	0.306176
08-13	H R	1.07543	0.03895	0.11833	0.0024	0.314912	89.72		803.5	72.77	720.9	13.82	0.526049
08-14	OZ R	1.00676	0.02512	0.10985	0.00185	0.43976	81.7795		821.6	47.56	671.9	10.73	0.437957
08-15	OZ R	1.09888	0.02509	0.12068	0.00197	0.488071	90.8922		808.1	42.47	734.5	11.36	0.305793
08-16	R	1.11184	0.03158	0.126	0.00229	0.402206	103.072		742.2	55.75	765	13.11	0.234723
08-17	R	1.12875	0.03796	0.1231	0.00227	0.270677	91.1016		821.5	68.75	748.4	13.05	0.353423
08-18	OZ R	1.10053	0.02558	0.12325	0.00193	0.400002	97.7047		766.8	46.09	749.2	11.09	0.911648
08-19	OZ R	1.07576	0.05697	0.12162	0.00276	0.0362834	98.8642		748.4	115.63	739.9	15.85	0.256488
08-20	OZ R	1.14499	0.02804	0.12592	0.00218	0.482768	95.005		804.8	45.76	764.6	12.46	0.233792
08-21	OZ C	1.03014	0.02761	0.1121	0.002	0.427897	82.7574		827.6	51.39	684.9	11.58	0.303883
08-22	H C	1.11986	0.02974	0.12073	0.00214	0.436623	86.743		847.1	50.45	734.8	12.33	0.688888
08-23	OZ R	0.78617	0.01757	0.08616	0.00144	0.525992	65.6077		812.1	40.66	532.8	8.57	1.20626
08-24	H R	0.99112	0.02522	0.10905	0.00188	0.446598	83.0161		803.7	48.6	667.2	10.94	0.782266
08-25	OZ R	1.09318	0.09406	0.12092	0.00392	0.270677	91.4616		804.6	184.97	735.9	22.55	0.209644
08-26	OZ R	1.11617	0.02777	0.12362	0.00213	0.464501	95.1139		790	46.98	751.4	12.22	0.200206
08-27	H R	1.1372	0.03524	0.12517	0.00234	0.358923	94.67		803	61.4	760.2	13.43	0.401521
08-28	H C	1.1467	0.02817	0.12477	0.00212	0.454078	91.6566		827	46.64	758	12.17	0.760583
08-29	OZ R	1.0112	0.03459	0.11075	0.00213	0.285984	83.141		814.4	69.61	677.1	12.34	0.46479
08-30	OZ R	1.05993	0.03688	0.12099	0.00236	0.32086	101.377		726.3	70.47	736.3	13.56	0.220952
Al Jobah
AJ14-19
19-01	OZ R	1.24616	0.02194	0.12722	0.00184	0.565957	80.467		959.4	30.87	772	10.55	0.563457
19-02	H R	1.31695	0.02013	0.14039	0.00196	0.647205	97.311		870.2	25.39	846.8	11.08	0.631665
19-03	H C	1.32962	0.0206	0.13812	0.00192	0.628872	90.2988		923.6	26.08	834	10.85	0.7744
19-04	H R	1.34063	0.01908	0.13771	0.00189	0.688472	87.8618		946.6	22.44	831.7	10.68	0.429697
19-05	H C*	1.2585	0.01868	0.13559	0.00186	0.656536	96.6399		848.2	24.63	819.7	10.57	0.0791898
19-06	R	1.22083	0.01791	0.13021	0.0018	0.677563	90.7951		869.1	23.7	789.1	10.27	0.665098
19-07	R	1.33397	0.02404	0.14075	0.00212	0.594736	95.2215		891.5	30.87	848.9	11.97	0.515188
19-08	C*	1.31942	0.02016	0.14312	0.00202	0.663063	103.406		833.9	24.91	862.3	11.41	0.794234
19-09	OZ R	1.29779	0.02005	0.1419	0.00201	0.663256	104.649		817.4	25.43	855.4	11.35	0.830676
19-10	H C*	1.29723	0.0204	0.13836	0.00195	0.636949	96.1224		869.1	26.28	835.4	11.05	1.28766
19-11	H R	1.24152	0.01893	0.13056	0.00184	0.66622	88.0762		898.2	24.74	791.1	10.48	0.723793
19-12	H C	1.22031	0.019	0.13074	0.00187	0.666234	92.1368		859.7	25.34	792.1	10.64	0.721013
19-13	R*	1.30559	0.02011	0.13848	0.00197	0.675121	94.9682		880.4	24.76	836.1	11.17	0.968048
19-14	OZ R	1.30354	0.02294	0.13937	0.00213	0.637692	97.3721		863.8	28.98	841.1	12.08	0.605863
19-15	OZ R	1.30615	0.02203	0.13987	0.00206	0.638043	98.0367		860.8	28.02	843.9	11.68	0.948899
19-16	OZ R	1.27577	0.02082	0.14115	0.00204	0.634075	107.407		792.5	27.45	851.2	11.51	0.628712
19-17	H C*	1.29424	0.02173	0.14048	0.00208	0.643143	101.766		832.6	27.81	847.3	11.74	0.541475
19-18	OZ R	1.32699	0.02249	0.14009	0.0021	0.654708	94.9444		890.1	27.39	845.1	11.88	0.321302
19-19	Co R	1.32138	0.02217	0.14296	0.00209	0.634018	102.633		839.3	28.02	861.4	11.81	0.800395
19-20	H C	1.34685	0.02214	0.13418	0.00197	0.653601	80.4859		1008.5	26.29	811.7	11.18	0.549862
19-21	H C	1.31004	0.01996	0.14161	0.00206	0.711669	101.546		840.8	23.51	853.8	11.62	0.415409
19-22	H C	1.30407	0.02063	0.1405	0.00205	0.681881	99.9646		847.8	25.19	847.5	11.61	0.462864
19-23	OZ R	1.29386	0.02059	0.14044	0.00206	0.680741	101.802		832.2	25.5	847.2	11.62	0.681286
19-24	H C *	1.40066	0.02295	0.14324	0.00211	0.65716	90.3276		955.3	26.34	862.9	11.9	0.800125
19-25	OZ R	1.27234	0.02009	0.13624	0.002	0.686571	95.6886		860.5	24.96	823.4	11.32	0.474553
19-26	H C	1.30587	0.02078	0.14084	0.00207	0.677507	100.449		845.6	25.32	849.4	11.68	0.428753
19-27	H C	1.26934	0.02018	0.1336	0.00196	0.684684	90.2131		896.1	25.06	808.4	11.16	0.797076
19-28	OZ R	1.31475	0.02117	0.14101	0.00208	0.671308	99.2183		857.1	25.77	850.4	11.73	0.744668
19-29	H C*	1.29684	0.02043	0.14051	0.00206	0.693387	101.388		836	24.79	847.6	11.66	0.274132
19-30	H C	1.29823	0.02141	0.14353	0.00212	0.661565	108.919		793.8	27.08	864.6	11.97	0.837369
19-31	H C	1.30541	0.02264	0.13672	0.00204	0.624386	91.1508		906.3	28.95	826.1	11.58	0.396781
19-32	OZ R	1.29218	0.02116	0.14042	0.00208	0.662765	102.073		829.8	26.52	847	11.75	0.337122
19-33	H C	1.31137	0.02168	0.14184	0.0021	0.662275	101.858		839.5	26.89	855.1	11.88	0.915848
19-34	H C	1.42002	0.02306	0.15014	0.00222	0.677133	101.692		886.7	25.81	901.7	12.46	0.610334
19-35	H C	1.29578	0.02163	0.13886	0.00207	0.658941	97.6013		858.8	27.18	838.2	11.7	0.774942
19-36	H C	1.27239	0.02165	0.13879	0.00207	0.63975	101.91		822.1	28.23	837.8	11.73	0.548577
19-37	H C	1.27396	0.0214	0.13689	0.00204	0.652093	96.9178		853.3	27.43	827	11.58	0.490567
19-38	H C	1.11076	0.01921	0.1017	0.00153	0.632446	53.0231		1177.6	27.51	624.4	8.95	1.05832
19-39	H C	1.28599	0.02116	0.13889	0.00207	0.670576	99.5015		842.6	26.41	838.4	11.7	0.238195
19-40	H C	1.31517	0.02214	0.14001	0.00209	0.652263	96.8027		872.6	27.34	844.7	11.84	0.539804
19-41	H C	1.28508	0.02113	0.13846	0.00203	0.652066	98.6431		847.5	26.89	836	11.51	0.561127
19-42	H C	1.27413	0.02007	0.13681	0.002	0.69058	96.7123		854.7	24.83	826.6	11.32	0.718476
19-43	Co H C	1.27901	0.02162	0.13918	0.00205	0.635133	101.572		827	28.24	840	11.62	0.382636
19-44	Co H C	1.29496	0.02036	0.1389	0.00203	0.69044	97.8411		856.9	24.71	838.4	11.47	0.262215
19-45	Co C	1.24447	0.0205	0.13252	0.00195	0.654163	92.006		871.9	26.83	802.2	11.1	0.486876
19-46	H C	1.31393	0.0227	0.13703	0.00203	0.61601	90.4699		915	28.88	827.8	11.53	0.71516
19-47	H C	1.33534	0.02335	0.14149	0.0021	0.61047	96.6905		882.3	29.58	853.1	11.88	0.63273
19-48	H R	1.24688	0.01969	0.13356	0.00195	0.685015	94.0095		859.7	24.86	808.2	11.11	1.31578
19-49	HC	1.27726	0.02119	0.1318	0.00194	0.648732	85.1943		936.8	26.87	798.1	11.07	0.973918
19-50	Co R	1.29232	0.02272	0.14084	0.0021	0.608385	103.108		823.8	30.07	849.4	11.85	0.841618
19-51	H C	1.26957	0.02185	0.1376	0.00204	0.624506	99.5091		835.2	28.99	831.1	11.57	0.796171
19-52	H C	1.23352	0.02111	0.13566	0.00201	0.626672	101.901		804.8	28.85	820.1	11.42	0.707618
19-53	H C	1.51869	0.02461	0.13915	0.00205	0.670311	71.3994		1176.2	24.83	839.8	11.59	0.445295
19-54	H C	1.27935	0.02117	0.13628	0.00201	0.65661	94.5254		871.3	26.94	823.6	11.41	1.22416
19-55	H C	1.22823	0.02182	0.13641	0.00204	0.608116	105.126		784.2	30.71	824.4	11.55	0.554444
19-56	H C	1.27743	0.02362	0.13871	0.00209	0.577474	100.722		831.4	32.42	837.4	11.82	0.49418
19-57	H C	1.25226	0.02221	0.13523	0.00202	0.604683	97.0218		842.8	30.32	817.7	11.48	0.65386
19-58	H C	1.27271	0.02123	0.13498	0.002	0.648861	92.7184		880.3	27.24	816.2	11.34	0.518866
19-59	H C	1.23019	0.02099	0.12831	0.00191	0.634155	85.0585		914.9	28.15	778.2	10.89	0.455919
19-60	H C	1.30151	0.02606	0.1412	0.00216	0.527841	102.196		833.2	36.31	851.5	12.2	0.534187
19-61	H C	1.32341	0.0251	0.14035	0.00213	0.567351	96.1499		880.5	33.35	846.6	12.02	0.598285
19-62	H C	1.26081	0.02382	0.13648	0.00207	0.562392	98.4246		837.9	33.37	824.7	11.72	0.647926
19-63	H C	1.24324	0.02378	0.13546	0.00205	0.555925	99.357		824.3	34.04	819	11.67	0.8252
19-64	H C	1.30002	0.02481	0.13529	0.00209	0.584513	88.9711		919.4	32.59	818	11.89	0.730783
19-65	OZ R	1.76015	0.03344	0.14376	0.00224	0.587906	61.85		1400	30.21	865.9	12.61	0.517033
19-66	OZ R	1.29355	0.02284	0.1407	0.00215	0.642183	102.5		827.9	29	848.6	12.14	0.632682
19-67	H C*	1.31319	0.02396	0.13743	0.00211	0.620754	91.4308		907.9	30.22	830.1	11.97	0.501659
AJ14-23
23-01	H C	21.4128	0.50524	0.30512	0.00681	0.402065	40.2273		4267.5	36.49	1716.7	33.65	1.78994
23-02	OZ R	1.28127	0.02139	0.14063	0.00213	0.685206	104.845		809	26.47	848.2	12.02	0.595812
23-03	H C *	1.29954	0.02274	0.14015	0.00213	0.650396	99.9764		845.7	28.64	845.5	12.07	0.623013
23-04	OZ R	1.27279	0.02164	0.13142	0.00199	0.66625	85.0882		935.5	26.86	796	11.36	1.19946
23-05	H C*	1.2766	0.02224	0.13778	0.0021	0.648297	98.59		844	28.44	832.1	11.89	0.747981
23-06	H R	1.33406	0.02491	0.14325	0.00222	0.607846	100.971		854.7	31.63	863	12.52	1.66327
23-07	OZ R	1.37733	0.02329	0.14278	0.00215	0.667247	92.7755		927.4	26.76	860.4	12.13	0.741343
23-08	H C	1.34513	0.02489	0.14064	0.0021	0.576424	93.2095		910.1	32	848.3	11.88	1.31049
23-09	H C	1.26409	0.02501	0.13823	0.00208	0.524198	102.129		817.2	36.02	834.6	11.8	0.56554
23-10	H C	1.26263	0.0229	0.13115	0.00191	0.563075	86.0019		923.7	31.77	794.4	10.89	1.1182
23-11	H C	1.34548	0.02426	0.13456	0.00195	0.559495	81.3068		1000.9	31.18	813.8	11.09	0.960087
23-12	H C	1.31778	0.02365	0.13691	0.00208	0.622536	89.6208		923	29.74	827.2	11.8	0.606039
23-13	H R	1.1579	0.0293	0.1176	0.00183	0.359449	73.7953		971.2	49.09	716.7	10.57	0.779841
23-14	H R	0.89236	0.02509	0.08163	0.00132	0.318832	42.8584		1180.4	53.7	505.9	7.84	0.865919
23-15	OZ R	1.24009	0.02175	0.13276	0.002	0.631748	93.3225		861.1	29.1	803.6	11.36	0.822826
23-16	OZ R	1.39629	0.02571	0.13787	0.00198	0.526622	81.079		1026.9	32.73	832.6	11.23	0.531665
23-17	H R	1.29645	0.02382	0.13722	0.00215	0.635445	93.6928		884.7	30.2	828.9	12.19	0.53
23-18	H R	1.06106	0.01988	0.11114	0.0016	0.514921	74.9393		906.6	34.12	679.4	9.26	0.722398
23-19	H R	1.25604	0.02143	0.1325	0.002	0.659944	89.972		891.5	27.47	802.1	11.39	0.63235
23-20	H R	1.29181	0.02288	0.13866	0.00212	0.638242	97.8378		855.6	29.17	837.1	12.02	0.579539
23-21	H R	1.27052	0.02142	0.13806	0.00209	0.672997	100.458		829.9	26.89	833.7	11.85	0.763287
23-22	H C	1.30031	0.03559	0.13977	0.00221	0.333025	98.8049		853.5	54.54	843.3	12.49	0.845594
23-23	D R*	1.26362	0.02193	0.13646	0.00198	0.593415	97.8173		843	30.08	824.6	11.23	0.806742
23-24	H R	1.30262	0.0253	0.13888	0.00219	0.595093	96.4006		869.6	33.24	838.3	12.42	0.465261
23-25	OZ R	1.2703	0.02503	0.13503	0.00206	0.535412	93.2397		875.7	35.37	816.5	11.7	0.953625
23-26	H R	1.29956	0.02438	0.13725	0.00201	0.538165	93.2621		889	33.76	829.1	11.37	0.261666
23-27	H R	1.31128	0.02403	0.14057	0.00219	0.63065	98.8228		858	30.43	847.9	12.37	0.56913
23-28	OZ R	1.33289	0.02451	0.14217	0.00209	0.558591	98.6416		868.7	32.69	856.9	11.8	1.01204
23-29	OZ R	1.28232	0.02353	0.13567	0.00209	0.608205	92.6353		885.3	30.93	820.1	11.84	0.653159
23-30	OZ R	1.25993	0.02142	0.13561	0.002	0.630339	96.4698		849.8	28.3	819.8	11.37	0.731388
AJ14-25
25-01	H R	1.32954	0.02345	0.14339	0.00222	0.501029	102.152		845.6	28.66	863.8	12.51	0.678952
25-02	OZ R	1.25371	0.02158	0.1281	0.00201	0.492801	81.1827		957.1	26.17	777	11.5	0.627274
25-03	OZ R	1.30152	0.02255	0.1372	0.00215	0.484572	92.8108		893	26.88	828.8	12.19	0.843796
25-04	OZ R	1.29895	0.0218	0.14041	0.0021	0.476344	100.713		841	27.3	847	11.87	0.606477
25-05	OZ C*	1.27597	0.02239	0.14034	0.00212	0.468116	105.207		804.7	29.44	846.6	12	0.600733
25-06	H R	1.27694	0.02355	0.14153	0.00223	0.459888	108.204		788.6	30.89	853.3	12.57	0.749441
25-07	H R	1.269	0.0219	0.1359	0.00208	0.451659	95.4783		860.3	27.92	821.4	11.79	0.695279
25-08	H R	1.47489	0.03624	0.13342	0.00235	0.443431	67.1798		1201.7	43.41	807.3	13.35	0.96024
25-09	H R	1.25876	0.02151	0.13793	0.00207	0.435203	102.486		812.7	28.36	832.9	11.7	0.710734
25-10	H R	1.29898	0.02705	0.13634	0.00204	0.426975	91.3313		902.1	38.78	823.9	11.55	1.1547
25-11	OZ R	1.2993	0.02463	0.14135	0.00227	0.418746	102.972		827.7	31.84	852.3	12.81	0.282921
25-12	OZ R	1.25639	0.02442	0.13891	0.0021	0.410518	105.631		793.8	35.13	838.5	11.86	1.13964
25-13	H R	1.29697	0.02504	0.13957	0.00223	0.40229	99.0708		850.2	32.88	842.3	12.61	0.482914
25-14	H R	1.23225	0.02247	0.1373	0.00213	0.394062	106.675		777.5	31.01	829.4	12.06	0.672226
25-15	H R	1.29994	0.02941	0.13827	0.00236	0.385833	95.4171		875	40.41	834.9	13.39	0.686173
25-16	H R	1.4381	0.0243	0.15062	0.0022	0.613267	99.7683		906.5	28.46	904.4	12.3	0.775599
25-17	H R	1.27594	0.02208	0.138	0.00213	0.669671	99.1434		840.5	27.7	833.3	12.07	0.583139
25-18	OZ R	1.28618	0.02125	0.14022	0.00211	0.683962	102.708		823.6	26.19	845.9	11.96	0.76741
25-19	H C	1.30072	0.02227	0.13744	0.00209	0.662239	93.4384		888.5	27.51	830.2	11.85	1.03344
25-20	H R	1.28094	0.02185	0.13831	0.00212	0.677687	98.9807		843.7	27.12	835.1	12.01	0.558987
25-21	H R	1.26984	0.02666	0.13437	0.00208	0.502123	91.8003		885.4	38.49	812.8	11.84	0.955963
25-22	H R	1.2812	0.02263	0.13783	0.00217	0.672021	97.7684		851.4	27.96	832.4	12.31	0.775271
25-23	OZ R	1.31907	0.0238	0.14004	0.00218	0.644848	96.1425		878.8	29.53	844.9	12.33	0.705642
25-24	H R	1.26464	0.02295	0.13813	0.00207	0.593124	101.794		819.4	31.59	834.1	11.74	1.21559
25-25	H R	1.31327	0.02187	0.13775	0.00206	0.673309	92.0549		903.7	26.4	831.9	11.69	0.846861
25-26	H R	1.30209	0.0243	0.13962	0.00225	0.64762	98.182		858.1	30.26	842.5	12.7	0.575448
25-27	H C	1.29285	0.02695	0.13733	0.00229	0.58823	94.5413		877.5	35.79	829.6	12.95	0.51191
25-28	H R	1.34071	0.02243	0.14023	0.00215	0.697121	93.0284		909.4	25.73	846	12.14	0.817678
25-29	H R	1.39514	0.03783	0.14676	0.00244	0.399603	98.3512		897.6	51.78	882.8	13.71	0.758076
25-30	H R	1.25228	0.02732	0.13054	0.00213	0.521979	86.2689		916.9	38.98	791	12.16	1.16773
25-31	H R	1.23611	0.02555	0.13706	0.00217	0.538969	105.023		788.4	37.3	828	12.31	0.786848
25-32	H R	1.28943	0.02314	0.13489	0.00208	0.64321	89.736		909	29.22	815.7	11.81	0.911716
25-33	H R	1.30513	0.0232	0.1411	0.00216	0.642881	101.201		840.8	29.15	850.9	12.22	0.720867
25-34	H R	1.36976	0.02673	0.13661	0.00223	0.623656	81.9907		1006.7	31.65	825.4	12.63	0.553231
25-35	H R	1.28936	0.0232	0.13844	0.00216	0.658028	97.7544		855	29.06	835.8	12.24	0.631912
Mirbat
Mr15-01
MR01-01	D R	1.24701	0.03055	0.13865	0.00194	0.282886	107.17		781	50.86	837	10.99	0.50716
MR01-02	H R	1.27912	0.0361	0.13666	0.00193	0.234679	95.5566		864.2	57.98	825.8	10.93	1.36302
MR01-03	Co R	1.2572	0.03649	0.13527	0.00197	0.216223	96.2122		850.1	60.21	817.9	11.17	0.507974
MR01-04	D C	1.25007	0.05112	0.13211	0.0023	0.149133	90.2516		886.3	84.53	799.9	13.1	1.08836
MR01-05	B R*	1.1843	0.03707	0.13413	0.00197	0.206675	109.294		742.4	65.73	811.4	11.22	0.759791
MR01-06	TOZ R	1.22226	0.03795	0.13451	0.002	0.204262	101.333		802.8	64.73	813.5	11.36	1.17494
MR01-07	OZ R	1.24323	0.03509	0.13506	0.00191	0.222799	98.3857		830.1	58.45	816.7	10.82	1.11371
MR01-08	H C	1.22291	0.036	0.12962	0.00187	0.208391	89.1524		881.3	60.63	785.7	10.68	0.744541
MR01-09	H R	1.25076	0.05605	0.13199	0.00227	0.131981	89.7373		890.6	92.03	799.2	12.9	0.647355
MR01-10	TOZ R	1.21213	0.03907	0.14082	0.00206	0.195994	123.373		688.4	68.25	849.3	11.66	0.453629
MR01-11	OZ R	1.36599	0.04354	0.13829	0.00212	0.188373	85.5708		975.8	65.26	835	12.01	0.848345
MR01-12	H C	1.24331	0.03098	0.13258	0.00181	0.257319	92.3475		869	51.19	802.5	10.32	0.515
MR01-13	H C	1.30307	0.08887	0.13779	0.00342	0.0781366	93.9596		885.7	139.66	832.2	19.37	0.59
MR01-14	Co R	0.91756	0.13892	0.13712	0.00327	0.0332461	662.72		125	324.05	828.4	18.53	1.00422
MR01-15	OZ R	1.1711	0.04218	0.13514	0.00212	0.160342	116.164		703.4	76.52	817.1	12.04	1.02087
MR01-16	H C	1.22966	0.03785	0.13134	0.00193	0.198567	91.891		865.7	63.69	795.5	10.99	1.0783
MR01-17	B R*	1.23911	0.03086	0.12994	0.00177	0.254995	87.1418		903.7	51.01	787.5	10.12	0.791048
MR01-18	OZ C	1.21693	0.03278	0.13367	0.00186	0.235186	100.161		807.5	56.15	808.8	10.57	0.689399
MR01-19	Co H C	1.36183	0.06998	0.13006	0.00263	0.0987602	72.0871		1093.4	103.17	788.2	14.98	0.808907
MR01-20	H C	1.28044	0.05111	0.1334	0.00215	0.147251	87.9974		917.3	81.83	807.2	12.21	0.943653
MR01-21	H C	1.28241	0.03122	0.13841	0.00186	0.249472	98.9696		844.3	50.43	835.6	10.51	0.706385
MR01-22	H R	1.18895	0.04475	0.13424	0.00204	0.158757	108.296		749.8	79.01	812	11.6	0.877463
MR01-23	TOZ C	1.40786	0.03483	0.14785	0.002	0.250527	98.657		901	50.94	888.9	11.26	0.972826
MR01-24	OZ R	1.2409	0.02639	0.13198	0.0017	0.303289	91.3685		874.7	43.39	799.2	9.67	0.641553
MR01-25	OZ R	1.26018	0.03488	0.13291	0.00185	0.22352	90.1906		892	56.93	804.5	10.54	0.452375
MR01-26	TOZ R	1.17908	0.03573	0.13041	0.00188	0.192201	99.6343		793.1	63.6	790.2	10.74	0.681228
MR01-27	H C	1.17652	0.09512	0.13411	0.00345	0.0625967	111.213		729.5	167.36	811.3	19.58	0.889401
MR01-28	D H C	1.25658	0.0407	0.1296	0.00191	0.186891	83.7348		938.2	66.31	785.6	10.88	0.458193
MR01-29	B H R	1.25735	0.0362	0.13144	0.00184	0.20999	87.4259		910.6	59.16	796.1	10.5	0.42091
MR01-30	D OZ R	1.21123	0.02654	0.12705	0.00164	0.278129	85.3254		903.6	44.85	771	9.38	0.856583
MR01-31	D Co C*	1.24649	0.02991	0.12701	0.00175	0.253655	80.1164		962.1	49.07	770.8	10.04	0.666997
MR01-32	OZ R	1.58664	0.03356	0.12751	0.00167	0.292043	54.0563		1431.1	40.18	773.6	9.57	0.647938
MR01-33	OZ R	1.21907	0.04231	0.132	0.00198	0.170888	95.4388		837.5	72.05	799.3	11.26	0.676786
MR01-34	OZ R	1.20688	0.10021	0.12528	0.00393	0.053346	82.6436		920.7	169.57	760.9	22.52	0.747106
MR01-35	D C*	1.19783	0.04417	0.13114	0.00201	0.151386	97.5083		814.7	76.83	794.4	11.43	0.612348
MR01-36	H C	1.32347	0.06694	0.13593	0.00253	0.100508	86.7948		946.6	103.09	821.6	14.37	0.607858
MR01-37	OZ R	1.32456	0.03084	0.13398	0.00178	0.263801	82.9004		977.8	47.23	810.6	10.11	0.789844
MR01-38	OZ R	1.08993	0.02192	0.10943	0.00138	0.316865	67.4152		993.1	40.38	669.5	8.01	0.801095
MR01-39	C*	2.56679	0.05248	0.13801	0.00178	0.297471	38.5263		2163.2	35.63	833.4	10.11	0.902839
MR01-40	Co OZ R	1.36273	0.02834	0.12117	0.00154	0.292773	59.6666		1235.7	40.27	737.3	8.88	0.804658
MR01-41	H Co C*	1.19127	0.04297	0.1332	0.002	0.156542	104.607		770.6	75.74	806.1	11.39	1.10473
MR01-42	D OZ R	1.18151	0.0272	0.1263	0.00165	0.263848	88.6768		864.6	47.64	766.7	9.45	0.32465
MR01-43	C*	1.10963	0.02884	0.11601	0.00159	0.224605	77.7302		910.2	53.69	707.5	9.2	0.886699
Mr15-02
MR02-03	TOZ C	1.1048	0.02948	0.12605	0.00179	0.261963	105.196		727.5	55.76	765.3	10.24	0.502134
MR02-04	H C	1.12028	0.05133	0.12694	0.00237	0.13056	103.758		807.6	65.33	804.6	11.37	0.230815
MR02-05	TOZ C	1.12664	0.02238	0.12825	0.00168	0.360266	106.212		732.4	40.66	777.9	9.61	0.9017
MR02-06	H C	1.19714	0.03176	0.13243	0.00186	0.25334	101.161		792.5	54.89	801.7	10.57	0.879349
MR02-07	OZ R	1.39987	0.02386	0.12944	0.00163	0.42585	67.7634		1158	32.05	784.7	9.31	0.906
MR02-08	H R	1.21011	0.0379	0.13293	0.002	0.208084	99.6285		742.5	96.59	770.4	13.56	0.636
MR02-09	H R	1.1002	0.05561	0.12841	0.00228	0.122036	114.664		679.2	106.44	778.8	13.04	0.785
MR02-10	H R	1.16127	0.02161	0.12678	0.00163	0.38741	93.83		820.1	37.32	769.5	9.3	0.953
MR02-11	H R	1.16621	0.03089	0.12627	0.00176	0.257104	91.5453		837.4	54.48	766.6	10.08	0.556
MR02-12	Co R	1.20472	0.03075	0.13071	0.0018	0.265756	95.0432		833.2	52.46	791.9	10.25	0.363
MR02-13	Co R	1.11687	0.03814	0.12582	0.00186	0.193762	101.286		754.3	71.25	764	10.64	0.456
MR02-14	H C	1.1206	0.02588	0.12624	0.0017	0.29942	101.604		754.3	47.84	766.4	9.73	0.513
MR02-15	D OZ R	1.23379	0.03528	0.13286	0.0019	0.235325	94.7449		848.7	58.86	804.1	10.81	0.832
MR02-16	OZ R	1.10094	0.03103	0.12527	0.00179	0.238938	103.764		733.2	59.1	760.8	10.23	1.23595
MR02-17	H C	1.13948	0.02751	0.12763	0.00175	0.276605	101.004		766.6	50.12	774.3	10	0.772727
MR02-18	Co D R	1.41453	0.0267	0.12401	0.00159	0.378305	59.6675		1263	35.49	753.6	9.12	0.801378
MR02-19	H C	1.23138	0.05491	0.13124	0.00218	0.137115	91.3468		870.2	91.37	794.9	12.42	0.284382
MR02-20	H C	1.08039	0.05891	0.12415	0.00227	0.107423	105.97		711.9	114.05	754.4	13.01	0.868698
MR02-21	H C	1.20957	0.02883	0.13426	0.00181	0.280635	103.281		786.3	49.22	812.1	10.29	0.643076
MR02-22	H C	1.20788	0.04715	0.13105	0.00204	0.160569	95.249		833.5	80.45	793.9	11.63	0.664711
MR02-23	D H R*	1.22123	0.03453	0.13363	0.00189	0.233637	99.1174		850.6	70.3	789.8	11.21	0.488956
MR02-24	H C	1.2113	0.04134	0.13035	0.00197	0.192383	92.8521		815.8	58.38	808.6	10.76	0.662749
MR02-25	H C	1.16125	0.03207	0.12914	0.00185	0.239402	100.166		781.7	57.46	783	10.58	0.832506
MR02-26	D OZ R	1.22116	0.03219	0.12906	0.00191	0.258953	88.2884		886.3	54.29	782.5	10.9	0.204005
MR02-27	D R	1.18783	0.02877	0.13054	0.00177	0.278842	98.0171		806.9	49.92	790.9	10.07	0.358979
MR02-28	SZ C	1.13516	0.04135	0.12795	0.00196	0.173897	103.026		753.4	76.21	776.2	11.22	0.841209
MR02-29	TOZ R	1.19212	0.03199	0.12924	0.00182	0.24723	93.7986		835.3	55.46	783.5	10.39	0.636638
MR02-30	TOZ	1.12594	0.08251	0.1277	0.0025	0.0754681	104.619		740.5	149.98	774.7	14.27	0.665937
MR02-31	DR*	1.17622	0.02954	0.13021	0.00177	0.265846	99.722		791.3	51.92	789.1	10.12	0.378559
MR02-32	OZ R	1.20379	0.03843	0.12288	0.00182	0.201868	77.8878		959.2	64.74	747.1	10.43	0.442934
MR02-33	OZ R	1.13423	0.10023	0.12758	0.00311	0.0600591	102.164		757.7	179.72	774.1	17.76	0.224955
MR02-34	D OZ R	1.18347	0.02353	0.1285	0.00165	0.355585	93.6771		831.9	40.16	779.3	9.41	0.502782
MR02-35	C	1.14509	0.0504	0.12553	0.00206	0.13286	93.9256		811.6	91.02	762.3	11.82	0.474241
MR02-36	R*	1.15968	0.02867	0.12709	0.00177	0.277461	94.952		812.2	51.1	771.2	10.12	0.981638
MR02-37	D R	1.18134	0.02741	0.12937	0.00173	0.295977	96.3632		813.9	47.69	784.3	9.9	0.792373
MR02-38	SZ C	1.10176	0.05156	0.12448	0.00207	0.12513	101.069		748.3	97.49	756.3	11.85	0.88773
MR02-39	D Co R	1.15252	0.03163	0.12648	0.00182	0.245038	94.8721		809.3	57.03	767.8	10.42	0.813666
MR02-40	D C Ro	1.22851	0.03962	0.13462	0.00207	0.19337	100.209		812.5	67.5	814.2	11.75	0.960933
MR02-41	H R	1.14021	0.0347	0.12903	0.00187	0.217291	105.035		744.8	63.74	782.3	10.67	1.21872
MR15-04
MR04-01	Co c	1.30415	0.02161	0.14136	0.00167	0.367661	102.072		835.1	33.92	852.4	9.46	0.267764
MR04-02	D R *	1.23012	0.02271	0.13444	0.00166	0.328661	99.4132		818	38.2	813.2	9.41	0.999341
MR04-03	OZ R	1.1381	0.02327	0.12571	0.00161	0.292504	95.9286		795.8	42.9	763.4	9.22	0.161278
MR04-04	OZ R	1.13794	0.02788	0.12506	0.00169	0.238435	94.1847		806.5	51.6	759.6	9.69	0.469863
MR04-05	OZ R	1.18846	0.03241	0.12693	0.00176	0.202533	88.9595		865.9	56.81	770.3	10.06	1.00005
MR04-06	C, OZ R	1.27913	0.01999	0.13753	0.00162	0.406849	97.5229		851.8	31.55	830.7	9.18	0.42091
MR04-07	C, OZ R	1.25441	0.02487	0.13861	0.00174	0.305846	105.298		794.7	41.32	836.8	9.83	0.514829
MR04-08	OZ R	1.18228	0.02298	0.12838	0.0016	0.306358	93.6605		831.3	40.23	778.6	9.13	0.234591
MR04-09	OZ R	1.30689	0.02403	0.13317	0.00164	0.333511	83.7299		962.5	37.09	805.9	9.33	0.178498
MR04-10	TOZ C	1.21337	0.02124	0.13411	0.00165	0.35	102.102		794.6	36.28	811.3	9.35	1.36971
MR04-11	OZ R	1.19984	0.02087	0.13214	0.0016	0.355027	99.7631		801.9	35.76	800	9.1	0.292067
MR04-12	OZ R	1.44784	0.02495	0.11842	0.00146	0.365189	51.6427		1397.1	32.38	721.5	8.41	0.14802
MR04-13	OZ R	1.32754	0.02248	0.13015	0.00158	0.372759	75.7491		1041.2	33.48	788.7	9.03	0.573002
MR04-14	TOZ R	1.0616	0.03044	0.11827	0.00177	0.194849	92.6698		777.6	61.23	720.6	10.18	0.213913
MR04-15	OZ R	1.21299	0.04975	0.13052	0.00234	0.129839	92.9915		850.4	86.19	790.8	13.35	0.371355
MR04-16	OZ R	1.20314	0.04017	0.13273	0.00197	0.166531	100.526		799.2	70.2	803.4	11.21	0.828249
MR04-17	OZ R	1.15202	0.03121	0.12746	0.00174	0.203269	97.5038		793.2	57.06	773.4	9.97	0.960341
MR04-18	OZ R	1.14594	0.03496	0.12818	0.00187	0.174032	100.922		770.4	64.7	777.5	10.69	1.04563
MR04-19	OZ R	1.30328	0.04154	0.13083	0.00199	0.168164	79.7384		994	65.18	792.6	11.35	0.645168
MR04-20	OZ R	1.15283	0.05302	0.12912	0.00218	0.109218	102.007		767.4	96.35	782.8	12.42	0.862919
MR04-21	OZ R	1.21096	0.06348	0.12156	0.00255	0.0905203	74.4739		993.1	107.34	739.6	14.65	0.650074
MR04-22	D OZ C	1.2274	0.01922	0.13305	0.00156	0.384421	96.385		835.4	31.95	805.2	8.87	0.442101
MR04-23	Co D R	1.20866	0.01883	0.13381	0.00156	0.388363	102.287		791.5	31.95	809.6	8.87	0.502134
MR04-24	TOZ R	1.15917	0.02413	0.12922	0.00164	0.286526	100.798		777.2	43.75	783.4	9.34	0.230815
MR04-25	OZ R	1.16609	0.03021	0.11955	0.00168	0.213469	76.5566		950.8	53.77	727.9	9.65	0.574896
MR04-26	H	1.24684	0.0232	0.12322	0.00152	0.316085	73.0304		1025.6	37.55	749	8.74	0.180481
MR04-27	D Co C	1.23347	0.02185	0.12761	0.00154	0.331293	83.0687		932	36.09	774.2	8.8	0.747761
MR04-28	OZ R	1.15086	0.0594	0.13017	0.00257	0.0951881	105.695		746.3	109.12	788.8	14.64	0.81121
MR04-29	OZ R	1.38503	0.02436	0.12718	0.00153	0.341242	65.8532		1172	34.56	771.8	8.76	0.0103781
MR04-30	OZ R	1.15263	0.02738	0.1255	0.00166	0.235655	92.2649		826.1	49.88	762.2	9.53	0.607284
MR04-31	OZ R	1.14266	0.0243	0.11936	0.00152	0.261354	79.7214		911.8	44.18	726.9	8.75	0.325132
MR04-32	OZ R	1.25248	0.04145	0.12455	0.00191	0.162583	74.7432		1012.4	67.77	756.7	10.93	0.9017
MR04-33	OZ R	1.36421	0.02772	0.11984	0.00154	0.275917	57.9416		1259.2	40.02	729.6	8.88	0.879349
MR04-34	OZ R	1.15059	0.04195	0.13109	0.00219	0.14383	108.736		730.3	78.32	794.1	12.46	0.286101
MR15-05
MR05-01	D OZ R	1.17579	0.01983	0.13027	0.00152	0.338712	99.9241		790	35.17	789.4	8.67	0.424328
MR05-02	SZ C	1.16108	0.03097	0.12701	0.0017	0.192281	94.4261		816.3	56.21	770.8	9.7	0.542965
MR05-03	R	1.13977	0.03142	0.12734	0.00173	0.189179	100.052		772.3	58.5	772.7	9.89	0.436725
MR05-04	SZ R	1.17819	0.02672	0.12898	0.00164	0.235792	95.9627		814.9	47.77	782	9.34	0.764554
MR05-05	H C	1.11237	0.02551	0.12599	0.00162	0.24242	102.892		743.5	48.9	765	9.26	0.482546
MR05-06	SZ R	1.15239	0.03297	0.12573	0.00173	0.176427	92.8945		821.9	60.22	763.5	9.93	0.490848
MR05-07	SZ R	1.14896	0.02853	0.12682	0.00165	0.21721	96.502		797.6	52.47	769.7	9.42	0.495642
MR05-08	OZ R	1.14715	0.0281	0.12715	0.00166	0.222961	97.7947		789	51.87	771.6	9.48	0.359921
MR05-09	OZ R	1.11924	0.03292	0.12675	0.00178	0.176114	103.414		743.9	62.78	769.3	10.2	0.562574
MR05-10	OZ R	1.13474	0.02618	0.1274	0.00162	0.239781	101.43		762.1	48.95	773	9.26	0.41986
MR05-11	SZ R	1.11823	0.03046	0.12703	0.00172	0.189302	104.6		737	58.13	770.9	9.84	0.629186
MR05-12	H R	1.11116	0.04663	0.12364	0.00209	0.114363	96.2844		780.5	88.7	751.5	11.97	0.610552
MR05-13	OZ R	1.03602	0.03741	0.12988	0.0019	0.142369	150.086		524.5	79.43	787.2	10.86	0.390068
MR05-14	SZ R	1.12222	0.03817	0.1249	0.00189	0.146808	97.2942		779.8	72.23	758.7	10.85	0.774361
MR05-15	B R	1.09932	0.03967	0.12419	0.00191	0.138093	100.801		748.6	76.74	754.6	10.94	0.740301
MR05-16	H D C	1.13482	0.02925	0.12365	0.00166	0.199178	91.124		824.7	54.39	751.5	9.51	1.04363
MR05-17	OZ R	1.14949	0.02542	0.12543	0.0016	0.240786	92.7206		821.5	46.67	761.7	9.15	0.388872
MR05-18	H R	1.12597	0.02241	0.12608	0.00154	0.280489	99.7784		767.1	42.16	765.4	8.82	0.500409
MR05-19	Co SZ R	1.08712	0.0316	0.12364	0.00168	0.179912	102.314		734.5	61.95	751.5	9.63	0.497341
MR05-20	OZ R	1.14776	0.03712	0.12352	0.00186	0.151987	88.3398		849.9	68.2	750.8	10.69	0.583848
MR05-21	OZ R	1.31345	0.03757	0.14668	0.00207	0.178393	114.11		773.2	61.01	882.3	11.63	0.593727
MR05-22	OZ R	1.1291	0.01928	0.12847	0.00149	0.324064	106.246		733.3	36.21	779.1	8.53	0.527173
MR05-23	OZ R	1.12693	0.02976	0.12309	0.00165	0.189926	91.2895		819.7	55.78	748.3	9.47	0.752271
MR05-24	SZ R	1.1139	0.032	0.12347	0.00173	0.177332	95.1687		788.6	61	750.5	9.94	0.736603
MR05-25	TOZ C	1.12438	0.01897	0.1257	0.00146	0.337519	99.0013		771	35.43	763.3	8.34	0.483818
MR05-26	SZ R	1.14852	0.05306	0.12494	0.00238	0.102088	91.6767		827.8	97.43	758.9	13.63	0.453217
MR05-27	TOZ R	1.06327	0.01684	0.12123	0.00139	0.35891	101.124		729.4	33.17	737.6	7.97	0.292623
MR05-28	B OZ R	1.23919	0.07548	0.12715	0.00278	0.0783294	81.3323		948.7	124.13	771.6	15.89	0.574471
MR05-29	SZ R	1.05917	0.03278	0.12143	0.00178	0.169056	103.012		717.2	66.27	738.8	10.25	0.71919
MR05-30	B R	1.16912	0.05646	0.13063	0.00223	0.108415	102.539		771.9	100.9	791.5	12.74	0.547646
MR05-31	OZ C*	1.11498	0.02842	0.12851	0.00169	0.214347	110.381		706.1	54.38	779.4	9.66	0.924308
MR05-32	OZ R	1.11557	0.02236	0.12602	0.00155	0.290275	102.19		748.7	42.18	765.1	8.87	0.4466
MR05-33	OZ R	1.13944	0.03093	0.12534	0.00172	0.207995	94.6413		804.3	57.11	761.2	9.83	0.801637
MR05-34	SZ R	1.14176	0.04106	0.12767	0.00206	0.158176	100.689		769.3	76.16	774.6	11.78	0.92483
MR05-35	SZ R	1.12307	0.03326	0.12657	0.00178	0.187961	101.992		753.2	62.63	768.2	10.21	0.450376
MR15-07
MR07-01	OZ R	1.40041	0.02594	0.15642	0.00194	0.338601	121.253		772.6	38.39	936.8	10.8	0.838862
MR07-02	OZ R	1.27785	0.02131	0.14242	0.00169	0.362845	102.12		815.9	42.24	833.2	9.69	0.960913
MR07-03	H R	1.22557	0.03763	0.13315	0.00191	0.183618	107.385		784	52.39	841.9	10.71	0.372849
MR07-04	OZ R	1.33069	0.02999	0.14364	0.00185	0.244238	102.208		810.8	52.06	828.7	10.44	0.878239
MR07-05	OZ R	1.25451	0.02212	0.13651	0.00165	0.336999	98.4917		822.1	50.51	809.7	10.14	0.897815
MR07-06	D OZ C	1.27367	0.0242	0.14139	0.00175	0.315131	111.582		758.1	42.21	845.9	9.76	0.858579
MR07-07	D R Ro	1.19799	0.01894	0.13312	0.00155	0.384224	100.995		793.9	55.78	801.8	10.44	0.776001
MR07-08	H B C *	1.32902	0.0338	0.14276	0.00192	0.195478	100.96		802.3	35.92	810	8.98	0.671571
MR07-09	D C Ro	1.22067	0.02209	0.13526	0.00163	0.313551	97.057		825.7	33.62	801.4	8.72	0.748094
MR07-10	D C Ro	1.17112	0.01718	0.12968	0.0015	0.401909	98.6378		822.2	33.66	811	8.85	0.754327
MR07-11	OZ R	1.19597	0.02393	0.13278	0.00163	0.278317	100.549		782.6	50.1	786.9	9.74	0.547527
MR07-12	OZ R	1.17756	0.02122	0.12729	0.00153	0.312739	97.2736		810.6	29.23	788.5	8.32	2.22954
MR07-13	OZ R Ro	1.15987	0.02041	0.12683	0.00155	0.326237	103.724		786.8	34.49	816.1	8.9	1.01264
MR07-14	OZ R	1.28189	0.02312	0.14179	0.00168	0.293781	102.755		765.9	51.25	787	9.86	0.352891
MR07-15	OZ R	1.20695	0.02078	0.13446	0.00158	0.316437	97.8471		891.8	39.16	872.6	9.89	1.13184
MR07-16	D C Ro	1.21774	0.02168	0.13302	0.00157	0.295994	101.545		802.8	38.08	815.2	9.19	0.992554
MR07-17	OZ R	1.20706	0.03174	0.13158	0.00181	0.206114	97.9507		790.5	38.04	774.3	8.73	1.68525
MR07-18	C*	1.21808	0.02714	0.13397	0.00171	0.237573	99.5245		799.2	30.92	795.4	8.47	1.21872
MR07-19	OZ C	1.23228	0.02348	0.13761	0.00167	0.27702	81.866		968.9	36.66	793.2	8.89	0.960933
MR07-20	OZ R	1.16289	0.02235	0.12751	0.00155	0.280224	98.3356		811.1	38.96	797.6	8.96	0.813666
MR07-21	TOZ R	1.60766	0.02993	0.16735	0.00203	0.298392	107.685		754.7	39.78	812.7	9.14	0.88773
MR07-22	OZ R	1.24856	0.02075	0.13978	0.00162	0.344355	109.861		767.7	34.83	843.4	9.16	0.792373
MR07-23	OZ R	1.19272	0.02244	0.13436	0.00161	0.294466	108.589		918.6	38.45	997.5	11.18	0.981638
MR07-24	OZ R	1.20096	0.02233	0.13171	0.00157	0.294921	95.3772		811.2	40.7	773.7	8.87	0.474241
MR07-25	OZ R	1.28875	0.0231	0.13093	0.00156	0.308428	107.53		772.9	40.63	831.1	9.44	0.924273
MR07-26	OZ R	1.19072	0.01781	0.13132	0.00149	0.384496	100.696		804.9	47.35	810.5	9.72	1.03948
MR07-27	OZ R	1.1531	0.02087	0.12762	0.00153	0.312603	96.746		823.6	55.61	796.8	10.29	0.600631
MR07-28	OZ C	1.22485	0.02226	0.1348	0.00162	0.314722	98.2308		819.6	37.59	805.1	8.93	1.13789
MR07-29	TOZ R	1.3742	0.02599	0.14496	0.00176	0.297614	104.484		778.3	36.24	813.2	8.98	0.654509
MR07-30	D C	1.15946	0.02781	0.12985	0.00173	0.22219	107.685		793.8	38.17	854.8	9.49	0.290789
MR07-31	TOZ R	1.21655	0.02013	0.13496	0.00157	0.340958	93.0497		827.3	36.72	769.8	8.86	0.70064
MR07-32	Co R	1.18603	0.01694	0.13011	0.00146	0.412252	91.0849		848	37.51	772.4	8.78	0.679796
MR07-33	H R	1.16837	0.02757	0.12984	0.00171	0.231845	102.33		785.4	42.1	803.7	9.29	0.484372
MR07-34	OZ R	1.22896	0.02001	0.13406	0.00156	0.360902	98.1028		801.2	30.18	786	8.56	0.954421
MR07-35	H R	1.21559	0.01978	0.13238	0.00153	0.360163	103.571		789.6	37.85	817.8	9.23	0.975852
MR07-36	OZ R	1.21574	0.02098	0.13389	0.00158	0.337683	100.549		855.5	53.83	860.2	10.86	1.29723
MR07-37	OZ R	1.19825	0.03145	0.13244	0.00183	0.198217	102.794		783.7	32.62	805.6	8.82	1.12197
MR07-38	TOZ R	1.24678	0.02495	0.14022	0.00173	0.283889	108.53		785.5	39.66	852.5	9.88	0.786785
MR07-39	D TOZ R	1.22702	0.02936	0.13383	0.00178	0.233531	99.7099		827.3	36.37	824.9	9.35	0.671808
MR07-40	Co TOZ R	1.25091	0.03087	0.13718	0.00184	0.228664	102.5		844.1	47.13	865.2	10.43	1.26075
MR07-41	OZ R	1.25719	0.03101	0.13951	0.00189	0.218032	95.5759		843.1	64.1	805.8	10.84	1.08462
MR07-42	OZ R	1.26108	0.02548	0.13798	0.00171	0.28165	110.435		777.2	34.42	858.3	9.54	0.83195
Concordance was calculated using ((206Pb/238U)/(207Pb/206Pb))*100. Abbreviations are as follows; OZ: oscillatory zonation, TOZ: thick oscillatory zonation, H: homogeneous, R: rim, C: core, *: on the same zircon grain as the analyses above, SZ: sector zonation, D: Dark, B: bright, Ro: rounded
